# Supplementary material for: Pomegranate (Punica granatum L.) Bioactive Compounds Alleviate Human Beta-Amyloid-(1-42)-Induced Tau-phosphorylation, Neuronal Death, Oxidative Stress and Reduced LPS-Induced Neuroinflammation in Alzheimer’s Disease
Source: Preprints.org preprint supplement (doi:10.20944/preprints202407.2420.v1), 2024-07-30
Supplement: Supplementary file 1 [file supplementary]

**Supplementary Data**

**Figure 1S.** The effect of human Aβ1-42 on H4 neurons viability. H4 cells were seeded in 96 well-plates for 24 h to stabilize, and then were stimulated or not with increasing concentrations (5 to 20 µg/ml) of human Aβ1-42 for an additional 24h. Results are expressed as mean ± SEM. ****p < 0.0001, indicates the level of significance in comparison with the control group.

**Linear Regression**

**Figure 4 S. Linear regression of figure 4:**

**Figure 5 S. Linear regression of figure 5:**

**Figure 6 S.** **Linear regression of figure 6:**

**Figure 7 S. Linear regression of figure 7:**

**Figure 8 S. Linear regression of figure 8:**

**Figure 9 S. Linear regression of figure 9:**
